# Supplementary material for: “Knitting up” the inter-dipole gaps in dielectric surfaces: an efficient route for high performance organic field-effect transistors
Source: Royal Society of Chemistry journal article supplement (doi:10.1039/c2jm15888d), 2012-01-01
Supplement: c2jm15888d.pdf [file c2jm15888d.pdf]

## Supplementary Information

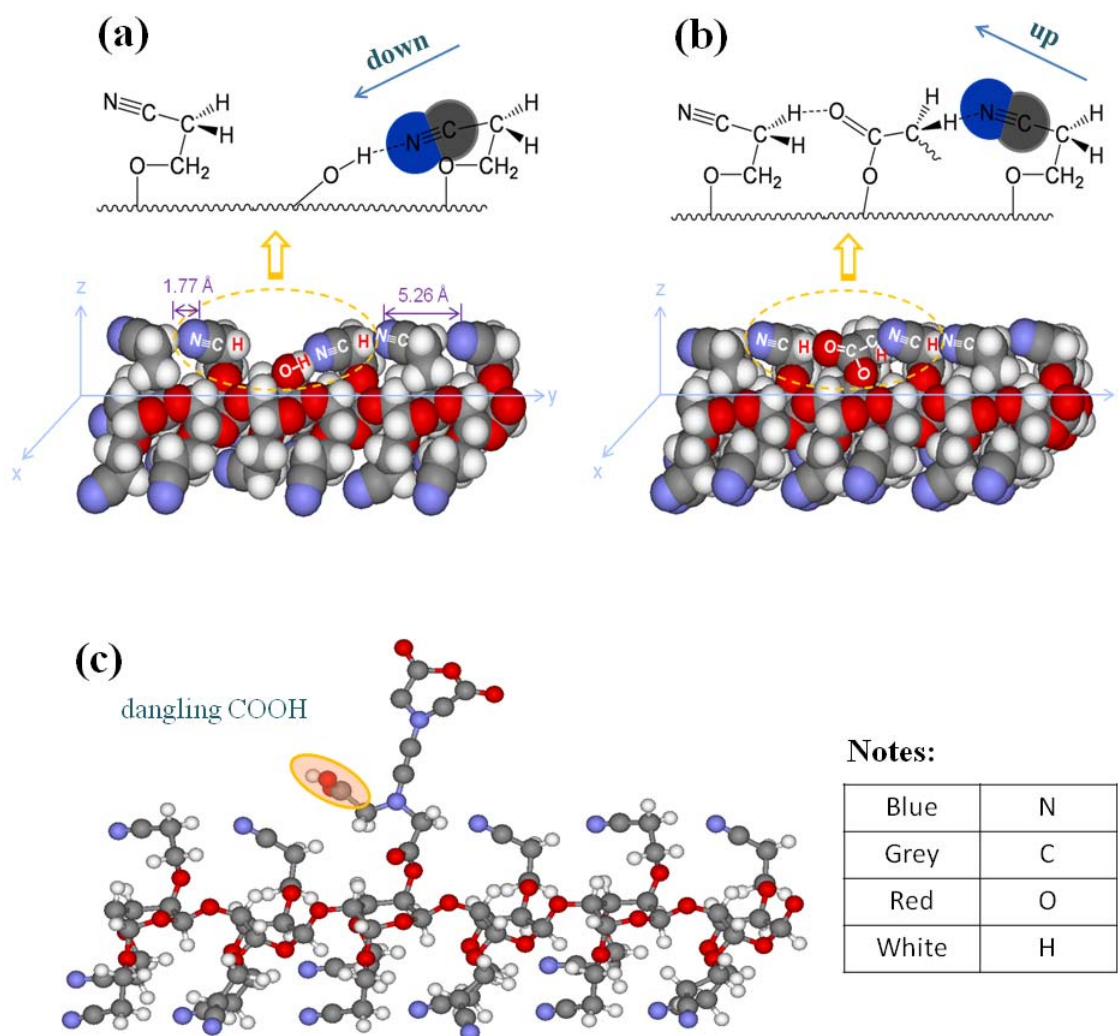

**Electronic supplementary information A.** Simulation of the CEP-based polymer chains (a) CEP, (b) CEPSCL and (c) CEPEDT(one anhydride group of EDT reacted).

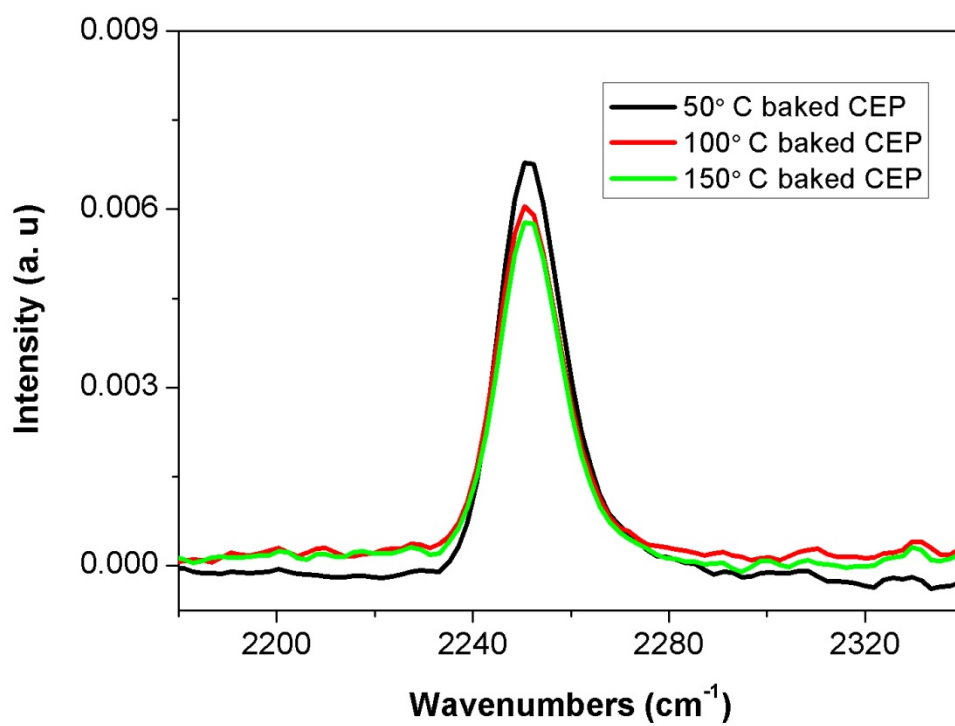

**Electronic supplementary information B.** FT-IR of CEP films baked at different temperatures.
